# Supplementary material for: Rice By-Products Reduce Seed and Seedlings Survival of Echinochloa crus-galli, Leptochloa chinensis and Fymbristylis miliacea
Source: MDPI journal article supplement (doi:10.3390/agronomy11040776), 2021-04-15
Supplement: s1 [file s1]

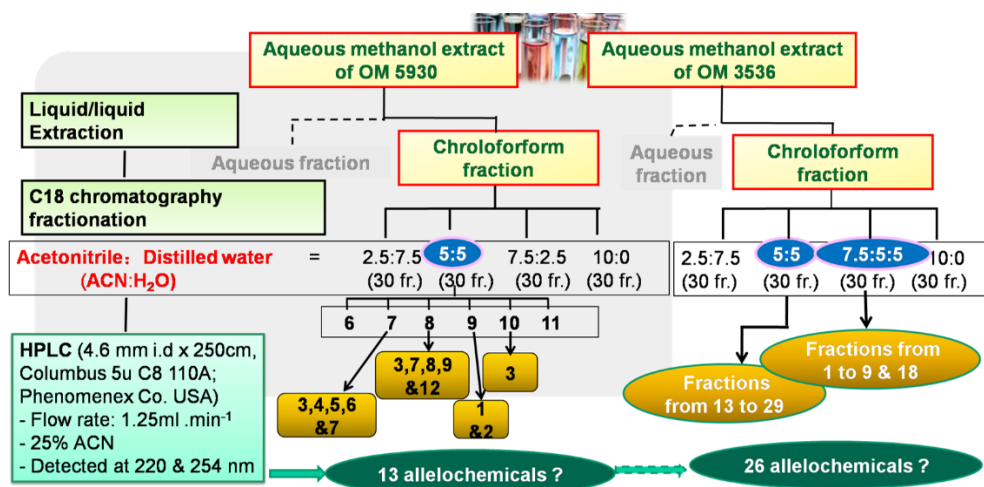

Figure S1: Isolation scheme of active compounds from the aqueous MeOH extracts of OM 5930 and OM 3536 rice varieties
